# Supplementary material
Source: PubMed Central journal article supplement (PMC7431790)
Supplement: JVI.00451-20-s0001.pdf [file JVI.00451-20-s0001.pdf]

**Supplemental Table 2. Glycans represented on the CDC glycan microarray.**

| #  | Structure                                                                                                                                                                                                                                                                                             |
|----|-------------------------------------------------------------------------------------------------------------------------------------------------------------------------------------------------------------------------------------------------------------------------------------------------------|
| 1  | Neu5Ac $\alpha$                                                                                                                                                                                                                                                                                       |
| 2  | Neu5Ac $\alpha$                                                                                                                                                                                                                                                                                       |
| 3  | Neu5Ac $\beta$                                                                                                                                                                                                                                                                                        |
| 4  | Neu5Ac $\alpha$ 2-3(6-O-Su)Gal $\beta$ 1-4GlcNAc $\beta$                                                                                                                                                                                                                                              |
| 5  | Neu5Ac $\alpha$ 2-3Gal $\beta$ 1-3[6OSO3]GalNAc $\alpha$                                                                                                                                                                                                                                              |
| 6  | Neu5Ac $\alpha$ 2-3Gal $\beta$ 1-4[6OSO3]GlcNAc $\beta$                                                                                                                                                                                                                                               |
| 7  | Neu5Ac $\alpha$ 2-3Gal $\beta$ 1-4(Fuc $\alpha$ 1-3)[6OSO3]GlcNAc $\beta$ -propyl-NH <sub>2</sub>                                                                                                                                                                                                     |
| 8  | Neu5Ac $\alpha$ 2-3Gal $\beta$ 1-3[6OSO3]GlcNAc-propyl-NH <sub>2</sub>                                                                                                                                                                                                                                |
| 9  | Neu5Ac $\alpha$ 2-3Gal $\beta$ 1-3(Neu5Ac $\alpha$ 2-3Gal $\beta$ 1-4)GlcNAc $\beta$                                                                                                                                                                                                                  |
| 10 | Neu5Ac $\alpha$ 2-3Gal $\beta$ 1-3(Neu5Ac $\alpha$ 2-3Gal $\beta$ 1-4GlcNAc $\beta$ 1-6)GalNAc $\alpha$                                                                                                                                                                                               |
| 11 | Neu5Ac $\alpha$ 2-3Gal $\beta$ 1-4GlcNAc $\beta$ 1-2Man $\alpha$ 1-3(Neu5Ac $\alpha$ 2-3Gal $\beta$ 1-4GlcNAc $\beta$ 1-2Man $\alpha$ 1-6)Man $\beta$ 1-4GlcNAc $\beta$ 1-4GlcNAc $\beta$                                                                                                             |
|    | Neu5Ac $\alpha$ (2-3)-Gal $\beta$ (1-4)-GlcNAc $\beta$ (1-3)-Gal $\beta$ (1-4)-GlcNAc $\beta$ (1-2)-Man $\alpha$ (1-3)-[Neu5Ac $\alpha$ (2-3)-Gal $\beta$ (1-4)-GlcNAc $\beta$ (1-3)-Gal $\beta$ (1-4)-GlcNAc $\beta$ (1-2)-Man $\alpha$ (1-6)]-Man $\beta$ (1-4)-GlcNAc $\beta$ (1-4)-GlcNAc $\beta$ |
| 12 |                                                                                                                                                                                                                                                                                                       |
| 13 | Neu5Ac $\alpha$ 2-3Gal $\beta$                                                                                                                                                                                                                                                                        |
| 14 | Neu5Ac $\alpha$ 2-3Gal $\beta$ 1-3GalNAc $\alpha$                                                                                                                                                                                                                                                     |
| 15 | Neu5Ac $\alpha$ 2-3Gal $\beta$ 1-3GlcNAc $\beta$                                                                                                                                                                                                                                                      |
| 16 | Neu5Ac $\alpha$ 2-3Gal $\beta$ 1-3GlcNAc $\beta$                                                                                                                                                                                                                                                      |
| 17 | Neu5Ac $\alpha$ 2-3Gal $\beta$ 1-4Glc $\beta$                                                                                                                                                                                                                                                         |
| 18 | Neu5Ac $\alpha$ 2-3Gal $\beta$ 1-4Glc $\beta$                                                                                                                                                                                                                                                         |
| 19 | Neu5Ac $\alpha$ 2-3Gal $\beta$ 1-4GlcNAc $\beta$                                                                                                                                                                                                                                                      |
| 20 | Neu5Ac $\alpha$ 2-3Gal $\beta$ 1-4GlcNAc $\beta$                                                                                                                                                                                                                                                      |
| 21 | Neu5Ac $\alpha$ 2-3GalNAc $\beta$ 1-4GlcNAc $\beta$                                                                                                                                                                                                                                                   |
| 22 | Neu5Ac $\alpha$ 2-3Gal $\beta$ 1-4GlcNAc $\beta$ 1-3Gal $\beta$ 1-4GlcNAc $\beta$                                                                                                                                                                                                                     |
| 23 | Neu5Ac $\alpha$ 2-3Gal $\beta$ 1-3GlcNAc $\beta$ 1-3Gal $\beta$ 1-4GlcNAc $\beta$                                                                                                                                                                                                                     |
| 24 | Neu5Ac $\alpha$ 2-3Gal $\beta$ 1-4GlcNAc $\beta$ 1-3Gal $\beta$ 1-4GlcNAc $\beta$ 1-3Gal $\beta$ 1-4GlcNAc $\beta$                                                                                                                                                                                    |
| 25 | Neu5Ac $\alpha$ 2-3Gal $\beta$ 1-4GlcNAc $\beta$ 1-3Gal $\beta$ 1-3GlcNAc $\beta$                                                                                                                                                                                                                     |
| 26 | Neu5Ac $\alpha$ 2-3Gal $\beta$ 1-3GalNAc $\alpha$                                                                                                                                                                                                                                                     |
| 27 | Gal $\beta$ 1-3(Neu5Ac $\alpha$ 2-3Gal $\beta$ 1-4(Fuc $\alpha$ 1-3)GlcNAc $\beta$ 1-6)GalNAc $\alpha$                                                                                                                                                                                                |
| 28 | Neu5Ac $\alpha$ 2-3Gal $\beta$ 1-3(Fuc $\alpha$ 1-4)GlcNAc $\beta$                                                                                                                                                                                                                                    |
| 29 | Neu5Ac $\alpha$ 2-3Gal $\beta$ 1-4(Fuc $\alpha$ 1-3)GlcNAc $\beta$                                                                                                                                                                                                                                    |
| 30 | Neu5Ac $\alpha$ 2-3Gal $\beta$ 1-4(Fuc $\alpha$ 1-3)GlcNAc $\beta$                                                                                                                                                                                                                                    |
| 31 | Neu5Ac $\alpha$ 2-3Gal $\beta$ 1-4(Fuc $\alpha$ 1-3)GlcNAc $\beta$ 1-3Gal $\beta$                                                                                                                                                                                                                     |

32 Neu5Ac $\alpha$ 2-3Gal $\beta$ 1-3[Fuca1-4]GlcNAc $\beta$ 1-3Gal $\beta$ 1-4[Fuca1-3]GlcNAc $\beta$   
33 Neu5Ac $\alpha$ 2-3Gal $\beta$ 1-3[Fuca1-3]GlcNAc $\beta$ 1-3Gal $\beta$ 1-4[Fuca1-3]GlcNAc $\beta$   
34 Neu5Ac $\alpha$ 2-3Gal $\beta$ 1-4(Fuca1-3)GlcNAc $\beta$ 1-3Gal $\beta$ 1-4(Fuca1-3)GlcNAc $\beta$ 1-3Gal $\beta$ 1-4(Fuca1-3)GlcNAc $\beta$   
35 Neu5Ac $\alpha$ 2-3(GalNAc $\beta$ 1-4)Gal $\beta$ 1-4GlcNAc $\beta$   
36 Neu5Ac $\alpha$ 2-3(GalNAc $\beta$ 1-4)Gal $\beta$ 1-4GlcNAc $\beta$   
37 Neu5Ac $\alpha$ 2-3(GalNAc $\beta$ 1-4)Gal $\beta$ 1-4Glc $\beta$   
38 Gal $\beta$ 1-3GalNAc $\beta$ 1-4(Neu5Ac $\alpha$ 2-3)Gal $\beta$ 1-4Glc $\beta$   
39 Fuca1-2Gal $\beta$ 1-3GalNAc $\beta$ 1-4(Neu5Ac $\alpha$ 2-3)Gal $\beta$ 1-4Glc $\beta$   
40 Fuca1-2Gal $\beta$ 1-3GalNAc $\beta$ 1-4(Neu5Ac $\alpha$ 2-3)Gal $\beta$ 1-4Glc $\beta$   
41 Neu5Ac $\alpha$ 2-6Gal $\beta$ 1-4[6OSO3]GlcNAc $\beta$   
42 Neu5Ac $\alpha$ 2-6Gal $\beta$ 1-4GlcNAc $\beta$ 1-2Man $\alpha$ 1-3(Gal $\beta$ 1-4GlcNAc $\beta$ 1-2Man $\alpha$ 1-6)Man $\beta$ 1-4GlcNAc $\beta$ 1-4GlcNAc $\beta$   
43 Neu5Ac $\alpha$ 2-6Gal $\beta$ 1-4GlcNAc $\beta$ 1-2Man $\alpha$ 1-3(Neu5Ac $\alpha$ 2-6Gal $\beta$ 1-4GlcNAc $\beta$ 1-2Man $\alpha$ 1-6)Man $\beta$ 1-4GlcNAc $\beta$ 1-4GlcNAc $\beta$   
44 Neu5Ac $\alpha$ 2-6Gal $\beta$ 1-4GlcNAc $\beta$ 1-3Gal $\beta$ 1-4GlcNAc $\beta$ 1-2Man $\alpha$ 1-3[Neu5Ac $\alpha$ 2-6Gal $\beta$ 1-4GlcNAc $\beta$ 1-3Gal $\beta$ 1-4GlcNAc $\beta$ 1-2Man $\alpha$ 1-6]Man $\beta$ 1-4GlcNAc $\beta$ 1-4GlcNAc $\beta$   
45 Neu5Ac $\alpha$ 2-6Gal $\beta$ 1-4GlcNAc $\beta$ 1-3Gal $\beta$ 1-4GlcNAc $\beta$ 1-3Gal $\beta$ 1-4GlcNAc $\beta$ 1-2Man $\alpha$ 1-3[Neu5Ac $\alpha$ 2-6Gal $\beta$ 1-4GlcNAc $\beta$ 1-3Gal $\beta$ 1-4GlcNAc $\beta$ 1-3Gal $\beta$ 1-4GlcNAc $\beta$ 1-3Gal $\beta$ 1-4GlcNAc $\beta$ 1-2Man $\alpha$ 1-6]-Man $\beta$ 1-4GlcNAc $\beta$ 1-4GlcNAc $\beta$   
46 Neu5Ac $\alpha$ 2-6Gal $\beta$ 1-4GlcNAc $\beta$ 1-3Gal $\beta$ 1-4GlcNAc $\beta$ 1-3[Neu5Ac $\alpha$ 2-6Gal $\beta$ 1-4GlcNAc $\beta$ 1-3Gal $\beta$ 1-4GlcNAc $\beta$ 1-6]GalNAca  
47 Neu5Ac $\alpha$ 2-6Gal $\beta$ 1-4GlcNAc $\beta$ 1-3[Neu5Ac $\alpha$ 2-6Gal $\beta$ 1-4GlcNAc $\beta$ 1-6]GalNAca  
48 Neu5Ac $\alpha$ 2-6GalNAca  
49 Neu5Ac $\alpha$ 2-6Gal $\beta$   
50 Neu5Ac $\alpha$ 2-6Gal $\beta$ 1-4Glc $\beta$   
51 Neu5Ac $\alpha$ 2-6Gal $\beta$ 1-4Glc $\beta$   
52 Neu5Ac $\alpha$ 2-6Gal $\beta$ 1-4GlcNAc $\beta$   
53 Neu5Ac $\alpha$ 2-6Gal $\beta$ 1-4GlcNAc $\beta$   
54 Neu5Ac $\alpha$ 2-6GalNAc $\beta$ 1-4GlcNAc $\beta$   
55 Neu5Ac $\alpha$ 2-6Gal $\beta$ 1-4GlcNAc $\beta$ 1-3GalNAca  
56 Neu5Ac $\alpha$ 2-6Gal $\beta$ 1-4GlcNAc $\beta$ 1-3Gal $\beta$ 1-4GlcNAc $\beta$   
57 Neu5Ac $\alpha$ 2-6Gal $\beta$ 1-4GlcNAc $\beta$ 1-3Gal $\beta$ 1-4GlcNAc $\beta$ 1-3GalNAca  
58 Neu5Ac $\alpha$ 2-6Gal $\beta$ 1-4GlcNAc $\beta$ 1-3Gal $\beta$ 1-4GlcNAc $\beta$ 1-3Gal $\beta$ 1-4GlcNAc $\beta$   
59 Neu5Ac $\alpha$ 2-6Gal $\beta$ 1-4GlcNAc $\beta$ 1-3Gal $\beta$ 1-4(Fuca1-3)GlcNAc $\beta$ 1-3Gal $\beta$ 1-4(Fuca1-3)GlcNAc $\beta$   
60 Gal $\beta$ 1-3(Neu5Ac $\alpha$ 2-6)GlcNAc $\beta$ 1-4Gal $\beta$ 1-4Glc $\beta$ -Sp10  
61 Neu5Ac $\alpha$ 2-6[Gal $\beta$ 1-3]GalNAca  
62 Neu5Ac $\alpha$ 2-6Gal $\beta$ 1-4GlcNAc $\beta$ 1-6[Gal $\beta$ 1-3]GalNAca  
63 Neu5Ac $\alpha$ 2-6Gal $\beta$ 1-4GlcNAc $\beta$ 1-3Gal $\beta$ 1-4GlcNAc $\beta$ 1-6[Gal $\beta$ 1-3]GalNAca

64 Neu5Ac $\alpha$ 2-3Gal $\beta$ 1-4GlcNAc $\beta$ 1-2Man $\alpha$ 1-3(Neu5Ac $\alpha$ 2-6Gal $\beta$ 1-4GlcNAc $\beta$ 1-2Man $\alpha$ 1-6)Man $\beta$ 1-4GlcNAc $\beta$ 1-4GlcNAc $\beta$

65 Neu5Ac $\alpha$ 2-6Gal $\beta$ 1-4GlcNAc $\beta$ 1-2Man $\alpha$ 1-3(Neu5Ac $\alpha$ 2-3Gal $\beta$ 1-4GlcNAc $\beta$ 1-2Man $\alpha$ 1-6)Man $\beta$ 1-4GlcNAc $\beta$ 1-4GlcNAc $\beta$

66 Neu5Ac $\alpha$ 2-3Gal $\beta$ 1-3(Neu5Ac $\alpha$ 2-6)GalNAc $\alpha$

67 Neu5Ac $\alpha$ 2-3(Neu5Ac $\alpha$ 2-6)GalNAc $\alpha$

68 Neu5Gc $\alpha$

69 Neu5Gc $\alpha$ 2-3Gal $\beta$ 1-3(Fuca1-4)GlcNAc $\beta$

70 Neu5Gc $\alpha$ 2-3Gal $\beta$ 1-3GlcNAc $\beta$

71 Neu5Gc $\alpha$ 2-3Gal $\beta$ 1-4(Fuca1-3)GlcNAc $\beta$

72 Neu5Gc $\alpha$ 2-3Gal $\beta$ 1-4GlcNAc $\beta$

73 Neu5Gc $\alpha$ 2-6GalNAc $\alpha$

74 Neu5Gc $\alpha$ 2-6Gal $\beta$ 1-4GlcNAc $\beta$

75 Neu5Ac $\alpha$ 2-8Neu5Ac $\alpha$

76 Neu5Ac $\alpha$ 2-8Neu5Ac $\alpha$ 2-8Neu5Ac $\alpha$

77 Neu5Ac $\alpha$ 2-8Neu5Ac $\alpha$ 2-3(GalNAc $\beta$ 1-4)Gal $\beta$ 1-4Glc $\beta$

78 Neu5Ac $\alpha$ 2-8Neu5Ac $\alpha$ 2-3Gal $\beta$ 1-4Glc $\beta$

79 Neu5Ac $\alpha$ 2-8Neu5Ac $\alpha$ 2-8Neu5Ac $\alpha$ 2-3(GalNAc $\beta$ 1-4)Gal $\beta$ 1-4Glc $\beta$

80 Neu5Ac $\alpha$ 2-8Neu5Ac $\alpha$ 2-8Neu5Ac $\alpha$ 2-3Gal $\beta$ 1-4Glc $\beta$

81 Neu5Ac $\alpha$ 2-8Neu5Ac $\beta$ -Sp17

82 Neu5Ac $\alpha$ 2-8Neu5Ac $\alpha$ 2-8Neu5Ac $\beta$

83 Neu5Ac $\beta$ 2-6GalNAc $\alpha$

84 Neu5Ac $\beta$ 2-6Gal $\beta$ 1-4GlcNAc $\beta$

85 Neu5Gc $\beta$ 2-6Gal $\beta$ 1-4GlcNAc

86 Gal $\beta$ 1-3(Neu5Ac $\beta$ 2-6)GalNAc $\alpha$

87 [9NAc]Neu5Ac $\alpha$

88 [9NAc]Neu5Ac $\alpha$ 2-6Gal $\beta$ 1-4GlcNAc $\beta$

89 Gal $\beta$ 1-4GlcNAc $\beta$ 1-3Gal $\beta$ 1-4GlcNAc $\beta$ 1-3Gal $\beta$ 1-4GlcNAc $\beta$

90 Gal $\beta$ 1-3GlcNAc $\beta$ 1-3Gal $\beta$ 1-3GlcNAc $\beta$

91 Gal $\beta$ 1-4GlcNAc $\beta$ 1-2Man $\alpha$ 1-3[Gal $\beta$ 1-4GlcNAc $\beta$ 1-2Man $\alpha$ 1-6]Man $\beta$ 1-4GlcNAc $\beta$ 1-4GlcNAc $\beta$

92 GalNAc $\alpha$ 1-3(Fuca1-2)Gal $\beta$ 1-3GlcNAc $\beta$

93 GalNAc $\alpha$ 1-3(Fuca1-2)Gal $\beta$ 1-4GlcNAc $\beta$

94 Gal $\alpha$ 1-3(Fuca1-2)Gal $\beta$ 1-3GlcNAc $\beta$

95 Gal $\alpha$ 1-3(Fuca1-2)Gal $\beta$ 1-4(Fuca1-3)GlcNAc $\beta$

96 Gal $\beta$ 1-3GalNAc $\alpha$
